# Supplementary material for: Isolation and characterization of a novel metagenomic enzyme capable of degrading bacterial phytotoxin toxoflavin
Source: PubMed Central journal article supplement (PMC5749703; doi:10.1371/journal.pone.0183893), 2018-01-02
Supplement: pone.0183893.s001.pdf [file pone.0183893.s001.pdf]

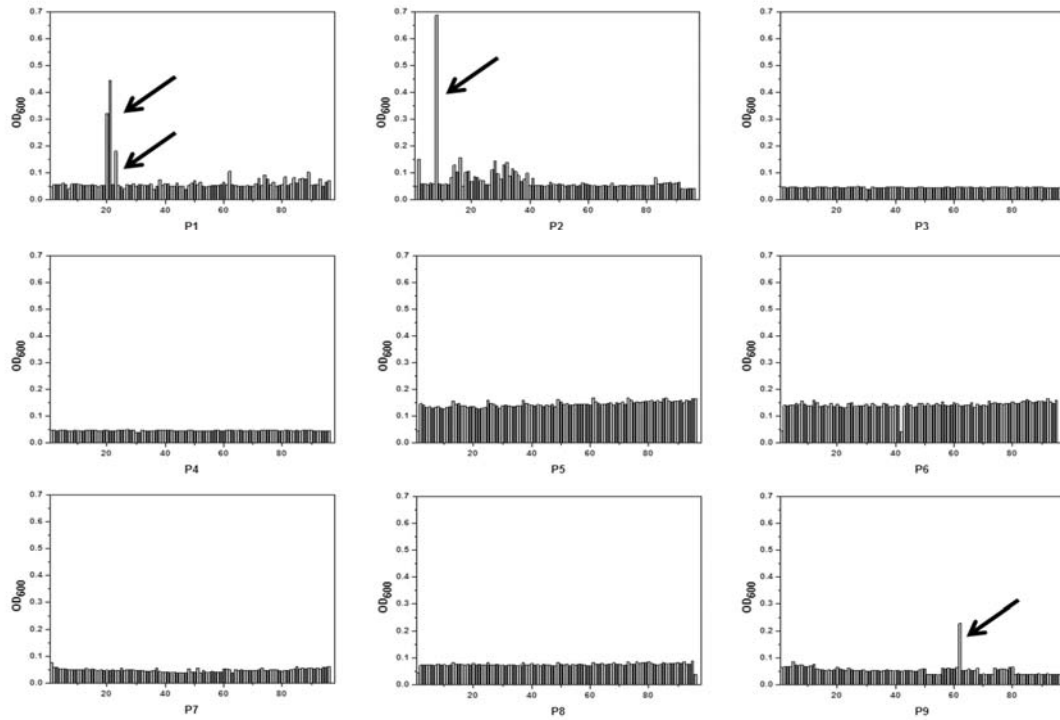

**S1 Fig.** The screening of metagenomic library for searching a toxoflavin degrading clone. Metagenomics pools grown in 9 deep well plates were further incubated in LB medium containing 20  $\mu\text{g}/\text{mL}$  toxoflavin. Based on optical densities showing over OD<sub>600nm</sub> 0.2, 5 metagenomic pools containing about 3,000 clones were selected.
