# Supplementary material for: Isolation and characterization of a novel metagenomic enzyme capable of degrading bacterial phytotoxin toxoflavin
Source: PubMed Central journal article supplement (PMC5749703; doi:10.1371/journal.pone.0183893), 2018-01-02
Supplement: pone.0183893.s006.pdf [file pone.0183893.s006.pdf]

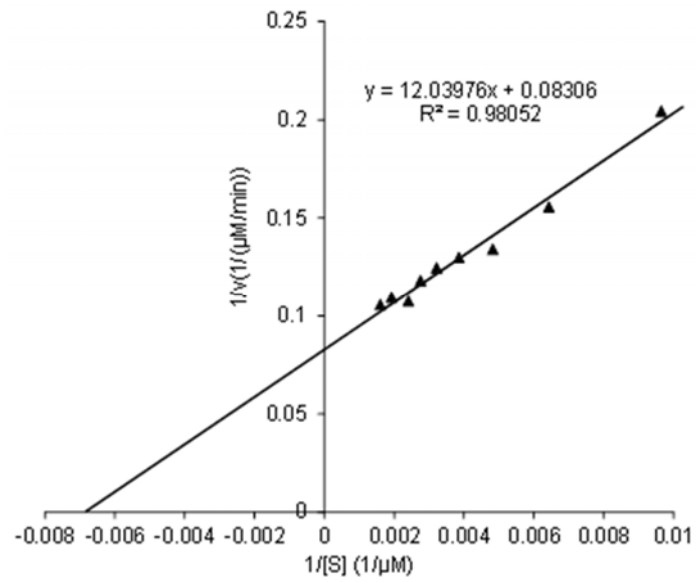

**S6 Fig.** Evaluation of Michaelis-Menten constant and maximum reaction rate. Total enzyme concentration used for enzyme kinetics was  $0.1275 \mu\text{M}$ .
