# Supplementary material for: Isolation and characterization of a novel metagenomic enzyme capable of degrading bacterial phytotoxin toxoflavin
Source: PubMed Central journal article supplement (PMC5749703; doi:10.1371/journal.pone.0183893), 2018-01-02
Supplement: pone.0183893.s007.pdf [file pone.0183893.s007.pdf]

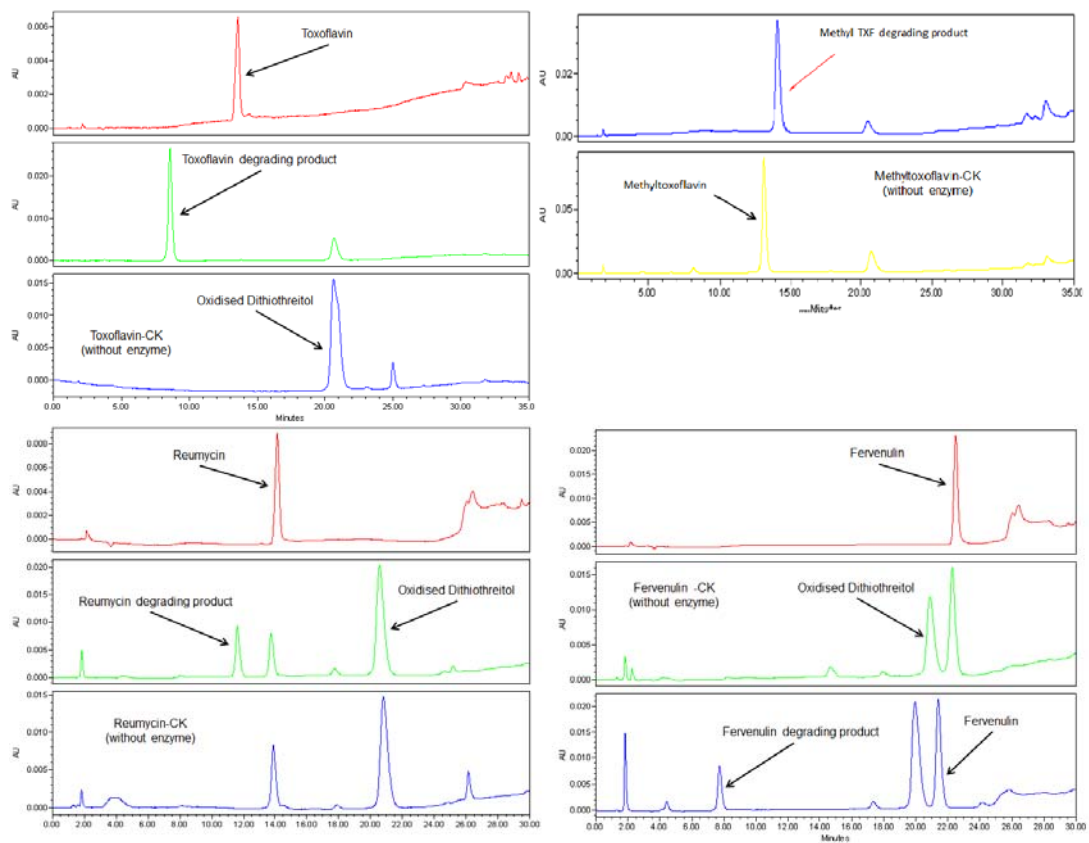

**S7 Fig.** HPLC analysis of toxoflavin (315 nm), methyltoxoflavin (254 nm) ferveulin (254 nm) and reumycin (260 nm) degradation. The purified TxeA of 40  $\mu$ g/ml was used.
