# Supplementary material for: Isolation and characterization of a novel metagenomic enzyme capable of degrading bacterial phytotoxin toxoflavin
Source: PubMed Central journal article supplement (PMC5749703; doi:10.1371/journal.pone.0183893), 2018-01-02
Supplement: pone.0183893.s008.pdf [file pone.0183893.s008.pdf]

MeOH : Water(10mM ammonium acetate) = 30 : 70 gradient TDP-22  
15-7-24-11 Sm (SG, 3x1)

BEH C18(2.1mm x 50mm x 1.7um  
2: Scan ES+  
8.2  
5.77e1

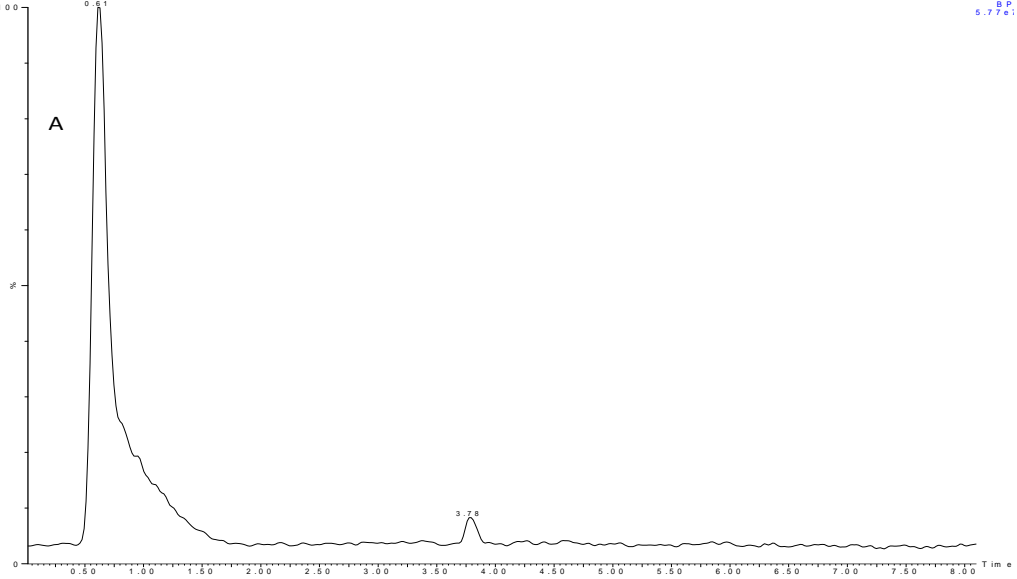

15-7-24-11 34 (0.578) Cm (34-43)

TDP-22

2: Scan ES+  
4.46e7

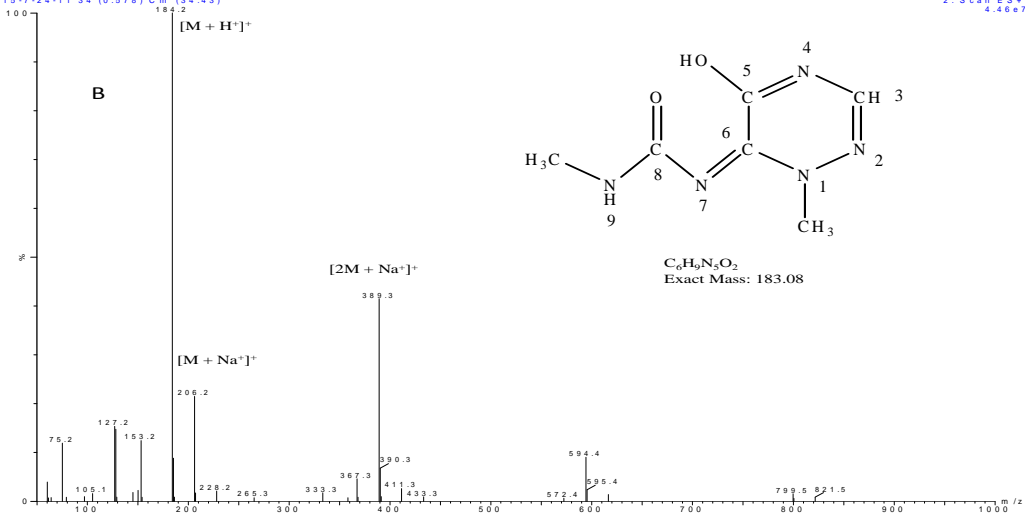

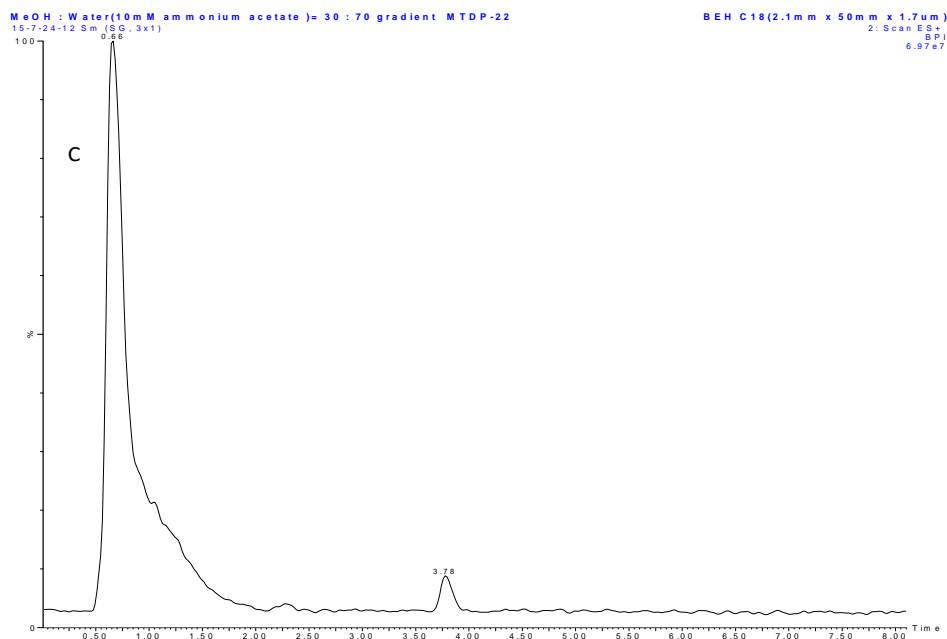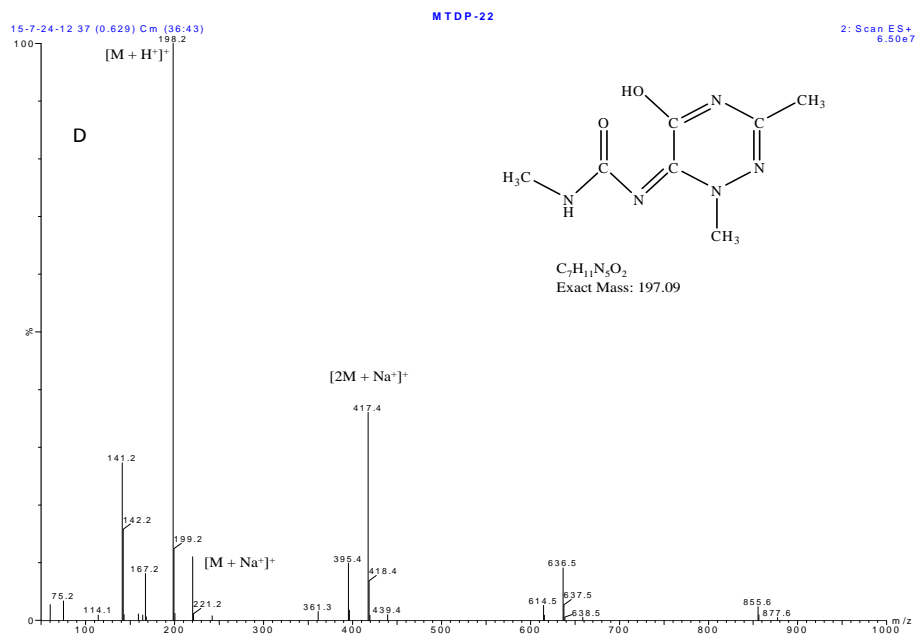

**S8 Fig.** LC-MS chromatography of enzymatic degradation of toxoflavin (A) and methyltoxoflavin (C). Mass spectrum of TDE catalyzed oxidation product of toxoflavin ( $R_f = 0.61$  min) and methyltoxoflavin (0.623 min)
