# Supplementary material for: Isolation and characterization of a novel metagenomic enzyme capable of degrading bacterial phytotoxin toxoflavin
Source: PubMed Central journal article supplement (PMC5749703; doi:10.1371/journal.pone.0183893), 2018-01-02
Supplement: pone.0183893.s011.pdf [file pone.0183893.s011.pdf]

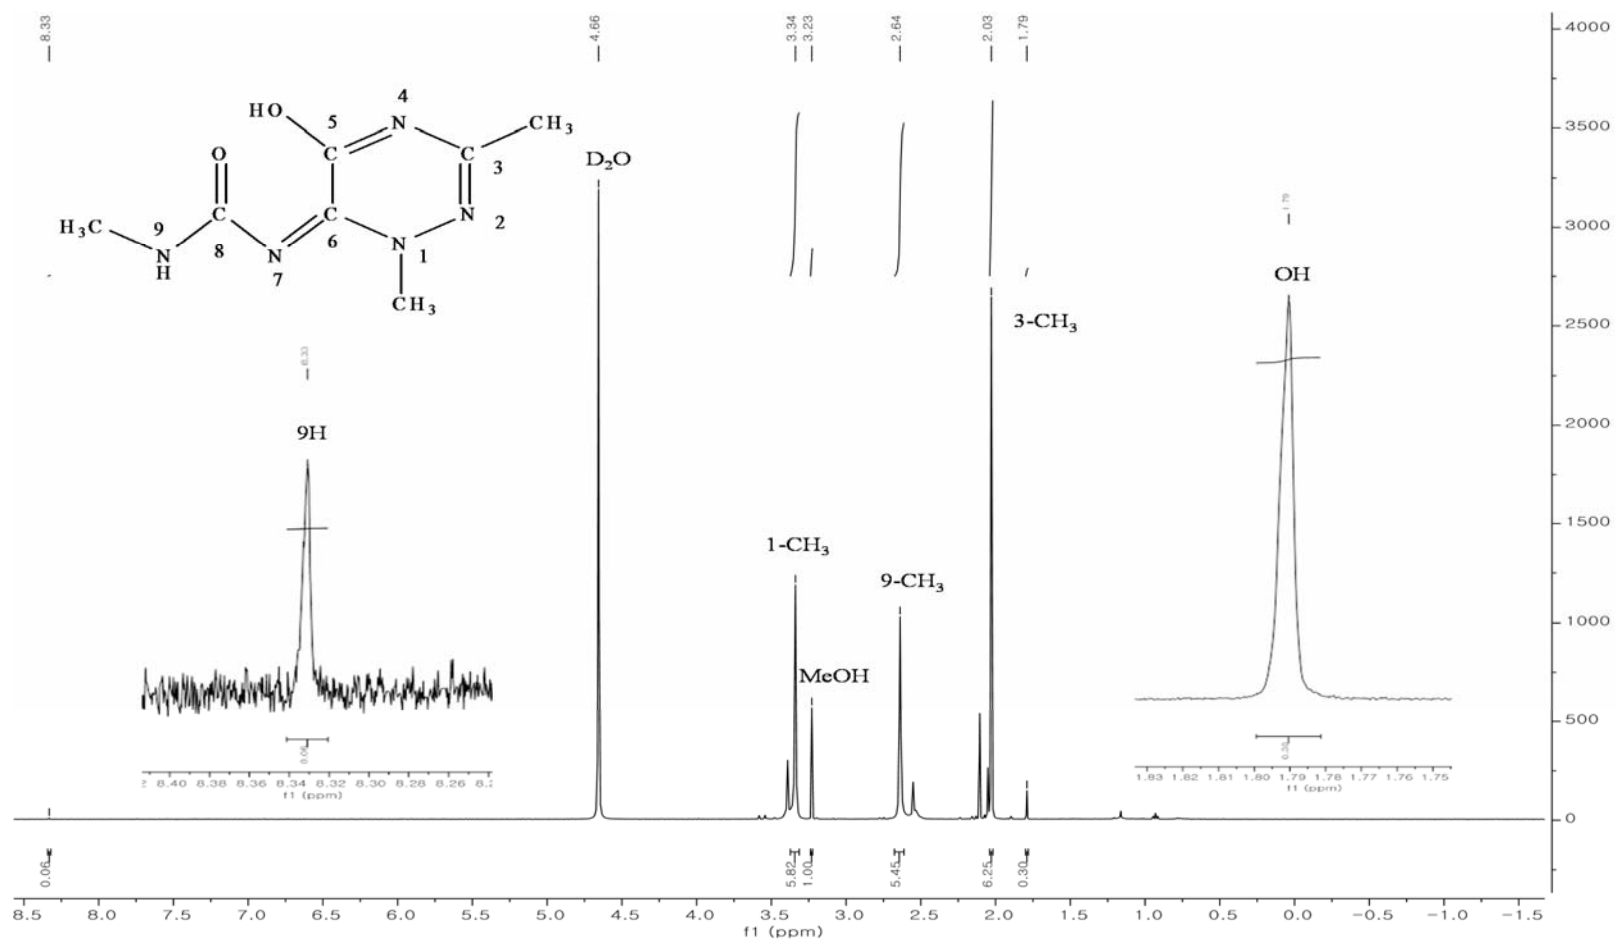

**S11 Fig.** <sup>1</sup>H-NMR of degrading products of methyltoxoflavin from TXE in D<sub>2</sub>O. Insert shows peak assignments based on the final structure and enlargement of the spectrum.
