# Supplementary material for: Isolation and characterization of a novel metagenomic enzyme capable of degrading bacterial phytotoxin toxoflavin
Source: PubMed Central journal article supplement (PMC5749703; doi:10.1371/journal.pone.0183893), 2018-01-02
Supplement: pone.0183893.s012.pdf [file pone.0183893.s012.pdf]

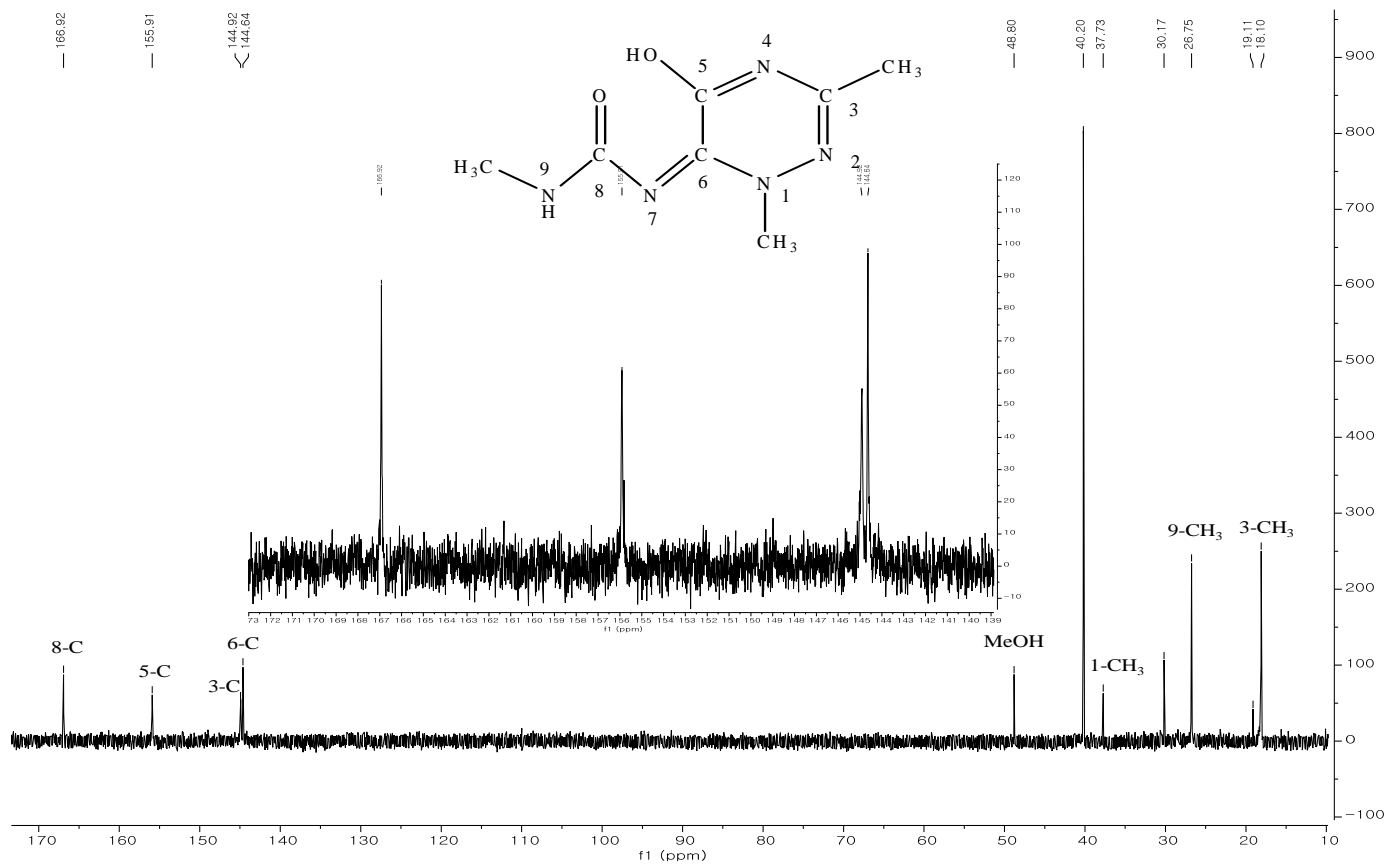

**S12 Fig.**  $^{13}\text{C}$ -NMR of degrading product of methyltoxoflavin from TXE in  $\text{D}_2\text{O}$ . Insert shows peak assignments based on the final structure and enlargement of the spectrum.
