# Supplementary material for: Isolation and characterization of a novel metagenomic enzyme capable of degrading bacterial phytotoxin toxoflavin
Source: PubMed Central journal article supplement (PMC5749703; doi:10.1371/journal.pone.0183893), 2018-01-02
Supplement: pone.0183893.s014.pdf [file pone.0183893.s014.pdf]

**S1 Table.** Homologous proteins of TxeA.

| Description                                                                                             | Query cover | E value | Max ident | Accession      |
|---------------------------------------------------------------------------------------------------------|-------------|---------|-----------|----------------|
| glyoxalase/bleomycin resistance protein/dioxygenase<br>[ <i>Opitutaceae bacterium</i> TAV5]             | 96%         | 3e-59   | 66%       | ZP_09595956.1  |
| lactoylglutathionelyase-like lyase<br>[ <i>Opitutaceae bacterium</i> TAV1]                              | 93%         | 3e-56   | 65%       | ZP_10268962.1  |
| lactoylglutathionelyase-like lyase<br>[ <i>Microvirga sp.</i> WSM3557]                                  | 97%         | 3e-52   | 58%       | ZP_10181559.1  |
| glyoxalase/bleomycin resistance protein/dioxygenase<br>[ <i>CandidatusSolibacterusitatus</i> Ellin6076] | 97%         | 3e-51   | 55%       | YP_826267.1    |
| glyoxalase/bleomycin resistance protein/dioxygenase<br>[ <i>Rhodopseudomonaspalustris</i> DX-1]         | 95%         | 2e-49   | 59%       | YP_004109357.1 |
| lactoylglutathionelyase [ <i>Rhodopseudomonaspalustris</i><br>CGA009]                                   | 93%         | 6e-49   | 59%       | NP_947811.1    |
